# Supplementary material for: Effects of Protein Supplementation Combined with Exercise Training on Muscle Mass and Function in Older Adults with Lower-Extremity Osteoarthritis: A Systematic Review and Meta-Analysis of Randomized Trials
Source: PubMed Central journal article supplement (PMC7468926; doi:10.3390/nu12082422), 2020-08-12
Supplement: nutrients-12-02422-s001.pdf [file nutrients-12-02422-s001.pdf]

## Supplementary Table S1

**Table S1. Database search formulas**

| <b>Data base</b>                               | <b>Search terms for query</b>                                           |
|------------------------------------------------|-------------------------------------------------------------------------|
| <b>Pubmed</b>                                  |                                                                         |
| #1                                             | (elder adults) or older adults                                          |
| #2                                             | osteoarthritis                                                          |
| #3                                             | arthroplasty or (total joint replacement)                               |
| #4                                             | #1 and ((#2) or #3)                                                     |
| #5                                             | ((whey protein) or (amino acid) or (leucine)) supplementation           |
| #6                                             | ((nutrition) or (nutrient)) intervention                                |
| #7                                             | #5 or #6                                                                |
| #8                                             | (exercise training) or (physical activity)                              |
| #9                                             | (randomized controlled trial) or randomization                          |
| #10                                            | #4 and #7 and #8 and #9                                                 |
| <b>Physiotherapy Evidence Database (PEDro)</b> |                                                                         |
|                                                | Method: clinical trial                                                  |
|                                                | Abstract and Title:                                                     |
| #1                                             | elderly                                                                 |
| #2                                             | osteoarthritis                                                          |
| #3                                             | arthroplasty                                                            |
| #4                                             | exercise training                                                       |
| #5                                             | physical activity                                                       |
| #6                                             | protein supplementation                                                 |
| #7                                             | nutrition intervention                                                  |
| <b>Excerpta Medica dataBASE (EMBASE)</b>       |                                                                         |
| #1                                             | osteoarthritis                                                          |
| #2                                             | arthroplasty                                                            |
| #3                                             | exercise training                                                       |
| #4                                             | physical activity                                                       |
| #5                                             | protein supplementation                                                 |
| #6                                             | nutrition intervention                                                  |
| #7                                             | #1 or #2                                                                |
| #8                                             | #3 or #4                                                                |
| #9                                             | #5 or #6                                                                |
| #10                                            | #7 and #8 and #9 and (randomized controlled trial)/lim and (humans)/lim |

(continued)

**Table S1. (continued)**

---

| <b>Data base</b>                                    | <b>Search terms for query</b>                                     |
|-----------------------------------------------------|-------------------------------------------------------------------|
| <b>Cochrane Library Database</b>                    |                                                                   |
| #1                                                  | elderly                                                           |
| #2                                                  | osteoarthritis                                                    |
| #3                                                  | arthroplasty                                                      |
| #4                                                  | exercise training                                                 |
| #5                                                  | physical activity                                                 |
| #6                                                  | protein supplementation                                           |
| #7                                                  | nutrition intervention                                            |
| #8                                                  | #1 and (#2 or #3)                                                 |
| #9                                                  | #4 or #5                                                          |
| #10                                                 | #6 or #7                                                          |
| #11                                                 | randomized controlled trial                                       |
| #12                                                 | #8 and #9 and #10 and #11                                         |
| <b>China knowledge resource integrated database</b> |                                                                   |
| #1                                                  | (osteoarthritis) or (arthroplasty)                                |
| #2                                                  | (exercise training) or (physical activity)                        |
| #3                                                  | (protein supplementation) or (nutrition intervention)             |
| #4                                                  | randomized controlled trial                                       |
| #5                                                  | #1 and #2 and #3 and #4                                           |
| <b>Google Scholar</b>                               |                                                                   |
| #1                                                  | allintitle: elderly or older adults                               |
| #2                                                  | allintitle: osteoarthritis or arthroplasty                        |
| #3                                                  | allintitle: exercise training                                     |
| #4                                                  | allintitle: physical activity                                     |
| #5                                                  | allintitle: "protein supplementation" or "nutrition intervention" |
| #6                                                  | allintitle: randomized controlled trial                           |

---

## Supplementary Table S2

**Table S2. Summary of protein supplementation protocols in the included studies**

| Study             | Experimental group |                                    |                 |                                                                                                 | Control group                                                                                                                                                                                       |                                       |
|-------------------|--------------------|------------------------------------|-----------------|-------------------------------------------------------------------------------------------------|-----------------------------------------------------------------------------------------------------------------------------------------------------------------------------------------------------|---------------------------------------|
|                   | Protein sources    | Intake amount (g/day or g/session) | Weekly servings | Supplement type                                                                                 | Intake timing                                                                                                                                                                                       | Source of supplement                  |
| Baldissarro 2016  | Leucine, EAA       | 8 g/day (2 servings/day)           | 14              | Oral EAAs (leucine 1.250 g/serving)                                                             | NR; the 14-day treatment was dictated by the rehabilitation center policy.                                                                                                                          | Placebo (maltodextrin)                |
| Dreyer 2013; 2018 | EAA                | 40 g/day (2 serving/day)           | 2               | 20 g master mix (leucine, 3.6 g/serving)                                                        | Daily at 10:00 AM and 14:00 PM; 1 hour after physical therapy                                                                                                                                       | Placebo (non-EAA; alanine 100%, 20 g) |
| Ikeda 2018        | BCAA               | 6 g /session                       | 7               | A 6-g tablet amino acid supplement (amino acids 3 g; leucine 21%); taken with 200 mL of water   | Before the exercise                                                                                                                                                                                 | Placebo (1.2-g starch polysaccharide) |
| Ikeda 2019        | BCAA               | 3.0 g /session                     | 7               | A 3.4-g tablet amino acid supplement (amino acids 3 g; leucine 40%); taken with 200 mL of water | After the exercise                                                                                                                                                                                  | Placebo (1.2-g starch polysaccharide) |
| Muyskens 2019     | EAA                | 40 g/day (2 serving/day)           | 14              | 20-g EAA supplement mixed with any liquid or food between meals (leucine 18%, 3.6 g /serving)   | Inpatient stay:<br>Daily at 10:00 AM and 14:00 PM; 1 hour after physical therapy.<br>Outpatient:<br>One hour after exercise on the physical-therapy day and at the regular times on all other days. | Placebo (non-EAA; alanine 100%, 20 g) |

AAS, amino acid supplementation; BCAA, branched chain amino acids; EAA, essential amino acids.

Supplementary Table S3

Table S3. Summary of exercise training protocols in the included studies

| Study (Author, year) | Experimental group                      |                                                                                           |                                                                         |                                                                                                                                                                                      |                                |                          |                                           |                                                        |                             |                       | Control group              |                                                                              |
|----------------------|-----------------------------------------|-------------------------------------------------------------------------------------------|-------------------------------------------------------------------------|--------------------------------------------------------------------------------------------------------------------------------------------------------------------------------------|--------------------------------|--------------------------|-------------------------------------------|--------------------------------------------------------|-----------------------------|-----------------------|----------------------------|------------------------------------------------------------------------------|
|                      | Training environment                    | Flexibility/ROM/stretching exercises                                                      | Muscle strengthening exercise (progressive RET)                         |                                                                                                                                                                                      |                                |                          | Endurance (AET)                           | Functional mobility exercises                          | Training time (min/session) | Frequency (session/w) | Intervention duration (wk) | Intervention                                                                 |
|                      |                                         |                                                                                           | Training part                                                           | Resistance set                                                                                                                                                                       | Intensity                      | Training volume          |                                           |                                                        |                             |                       |                            |                                                                              |
| Baldissarro 2016     | Supervised postoperative rehabilitation | Passive mobilization (hip, knee, and ankle); stretching (hip adductor and flexor muscles) | Lower extremity exercises                                               | Isotonic contraction: hip extension (gluteus); knee extension (quadriceps)                                                                                                           | Against a resistance of 1.0 kg | NR                       | Maintenance of cardiorespiratory capacity | Gait training (use of walking sticks); stair training. | 45                          | 2 session/d;          | 2                          | Exercise control group: the same exercise program as experimental group did. |
| Dreyer 2013; 2018    | Supervised physical therapy             | NR                                                                                        | Lower limbs (Physical therapy)                                          | NR                                                                                                                                                                                   | NR                             | NR                       | NR                                        | NR (Physical therapy)                                  | NR                          | 7                     | 3                          | The same exercise program as experimental group did.                         |
| Ikeda 2018           | Home-based exercise                     | None                                                                                      | Lower extremity (hip abduction and clamshell exercise)                  | Elastic bands; tonic force generation method (seated on the muscle training machine, 3-s eccentric, 3-s concentric, and 1-s isometric actions, with no rest between each repetition) | Low-intensity; slow movement   | 2 sets of 20 repetitions | None                                      | None                                                   | NR                          | 7                     | 4                          | The same exercise program as experimental group did.                         |
| Ikeda 2019           | Rehabilitation-ward exercise therapy    | ROM exercises (20 min)                                                                    | Lower extremity (hip abduction, clamshell exercise, and knee extension) | Elastic bands                                                                                                                                                                        | NR                             | 20 min                   | None                                      | Gait and ADL training (20 min)                         | 60                          | 7                     | 4                          | The same exercise program as experimental group did.                         |
| Muyskens 2019        | Supervised physical therapy             | NR                                                                                        | Lower limbs (Physical therapy)                                          | NR                                                                                                                                                                                   | NR                             | NR                       | None                                      | NR (Physical therapy)                                  | NR                          | 7                     | 3                          | Theme-based sitting activities (watching films, reading, conversation)       |

AET, aerobic exercise training; RET, resistance exercise training; ROM, range of motion; ADL, activities of daily living; NR, not reported.

## Supplementary Table S4

**Table S4. Methodological quality of the included studies<sup>a</sup>**

| Study<br>(author, year)  | Overall <sup>b</sup> | Eligibility<br>criteria <sup>c</sup> | 1 | 2 | 3 | 4 | 5 | 6 | 7 | 8 | 9 | 10 |
|--------------------------|----------------------|--------------------------------------|---|---|---|---|---|---|---|---|---|----|
| Baldissarro, 2016        | 9/10                 | X                                    | X | X | X | X |   | X | X | X | X | X  |
| Dreyer, 2013             | 6/10                 | X                                    | X |   | X | X |   | X |   |   | X | X  |
| Dreyer, 2018             | 6/10                 | X                                    | X |   | X | X |   | X |   |   | X | X  |
| Ikeda, 2018 <sup>d</sup> | 8/10                 | X                                    | X | X | X | X |   |   | X | X | X | X  |
| Ikeda, 2019              | 8/10                 | X                                    | X | X | X | X |   |   | X | X | X | X  |
| Muyskens, 2019           | 6/10                 | X                                    | X |   | X | X |   | X |   |   | X | X  |
| Summary <sup>e</sup>     |                      | 6                                    | 6 | 3 | 6 | 6 | 0 | 4 | 3 | 3 | 6 | 6  |

<sup>a</sup>PEDro, Physiotherapy Evidence Database. Guidelines of PEDro scale are available from PEDro database (<https://www.pedro.org.au/english/downloads/pedro-scale/>).

<sup>b</sup>Points of methodological quality are denoted as “X” for fulfilled criteria.

<sup>c</sup>This item is not used to calculate the total score.

<sup>d</sup>Score was determined by a third assessor.

<sup>e</sup>This was calculated as the number of studies satisfied.

PEDro classification scale: 1 = random allocation, 2 = concealed allocation, 3 = similarity at the baseline, 4 = subject blinding, 5 = therapist blinding, 6 = assessor blinding, 7 = more than 85% follow-up for at least one key outcome, 8 = intention-to-treat analysis, 9 = between-group statistical comparison for at least one key outcome, 10 = point and variability measures for at least one key outcome. Methodological quality: high,  $\geq 7$  points; medium, 4–6 points; low,  $\leq 3$  points.

## Supplementary Figure S1

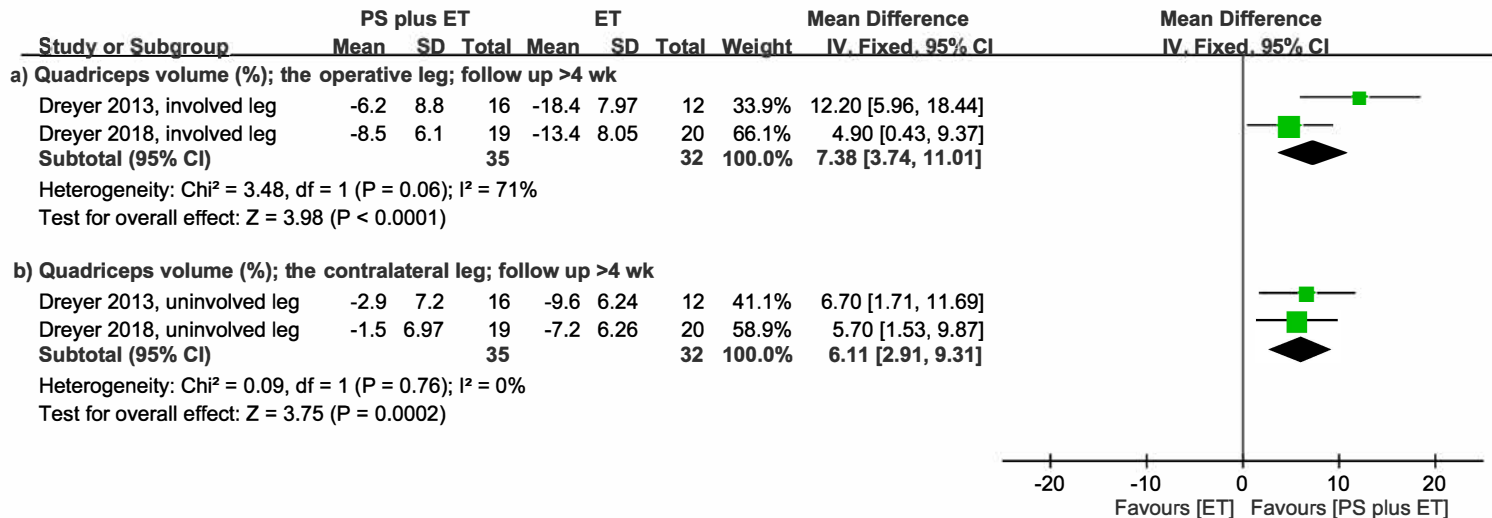

**Figure S1.** Forest plot summarizing the effects of postoperative protein supplementation (PS) plus exercise training (ET) on changes in quadriceps muscle volume of (a) the involved leg and (b) the contralateral uninvolved leg over medium-term follow-up. For each trial, the square represents the point estimate of the intervention effect. The horizontal line links the lower and upper limits of the 95% CI of this effect. The area of the squares reflects the relative weight of the trials in the meta-analysis. Trial results plotted on the right-hand side of the vertical axis indicate effects in favor of protein supplementation. The combined effects are plotted using black diamonds. 95% CI, 95% confidence interval; Std, standard; IV, inverse variance.

## Supplementary Figure S2

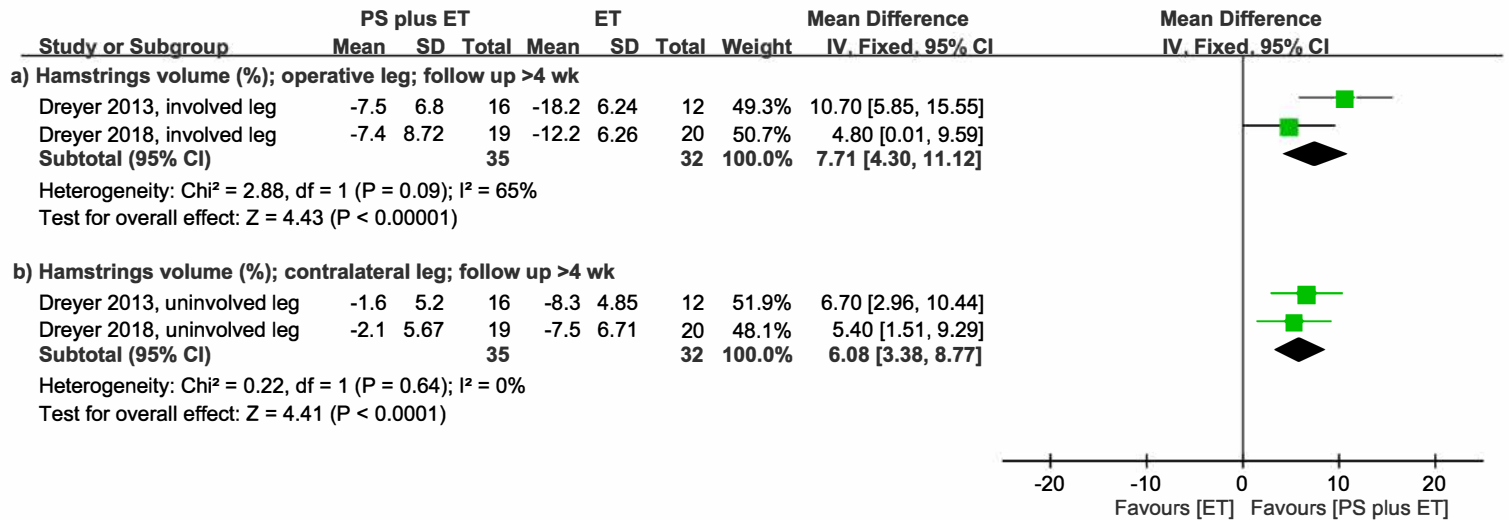

**Figure S2.** Forest plot summarizing the effects of postoperative protein supplementation (PS) plus exercise training (ET) on changes in hamstring muscle volume of (a) the involved leg and (b) the contralateral uninvolved leg over medium-term follow-up. For each trial, the square represents the point estimate of the intervention effect. The horizontal line links the lower and upper limits of the 95% CI of this effect. The area of the squares reflects the relative weight of the trials in the meta-analysis. Trial results plotted on the right-hand side of the vertical axis indicate effects in favor of protein supplementation. The combined effects are plotted using black diamonds. 95% CI, 95% confidence interval; Std, standard; IV, inverse variance.

Supplementary Figure S3

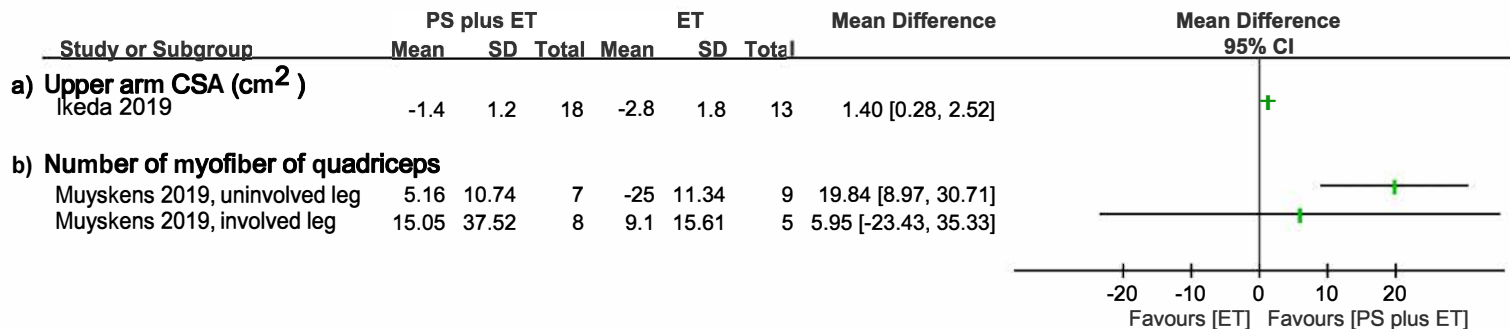

**FigureS3.** Forest plot summarizing the effects of postoperative protein supplementation (PS) plus exercise training (ET) on changes in (a) upper-arm CSA and (b) number of quadriceps myofibers over the overall follow-up period. For each trial, the square represents the point estimate of the intervention effect. The horizontal line links the lower and upper limits of the 95% CI of this effect. Trial results plotted on the right-hand side of the vertical axis indicate effects in favor of protein supplementation.

95% CI, 95% confidence interval; Std, standard; IV, inverse variance; CSA, cross-sectional area.



## Supplementary Figure S4

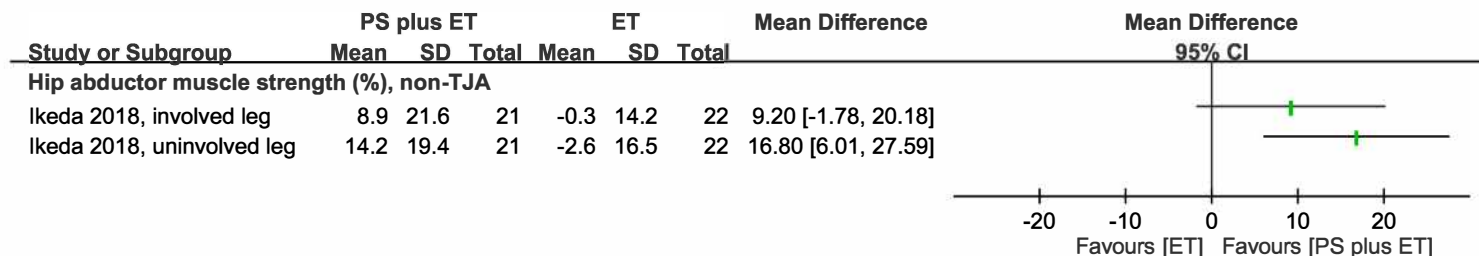

**Figure S4.** Forest plot summarizing the effects of protein supplementation (PS) plus exercise training (ET) on changes in hip abductor strength in patients who did not undergo total joint arthroplasty. For each trial, the square represents the point estimate of the intervention effect. The horizontal line links the lower and upper limits of the 95% CI of this effect. Trial results plotted on the right-hand side of the vertical axis indicate effects in favor of protein supplementation. 95% CI, 95% confidence interval; Std, standard; IV, inverse variance; TJA, total joint arthroplasty.

Supplementary Figure S5

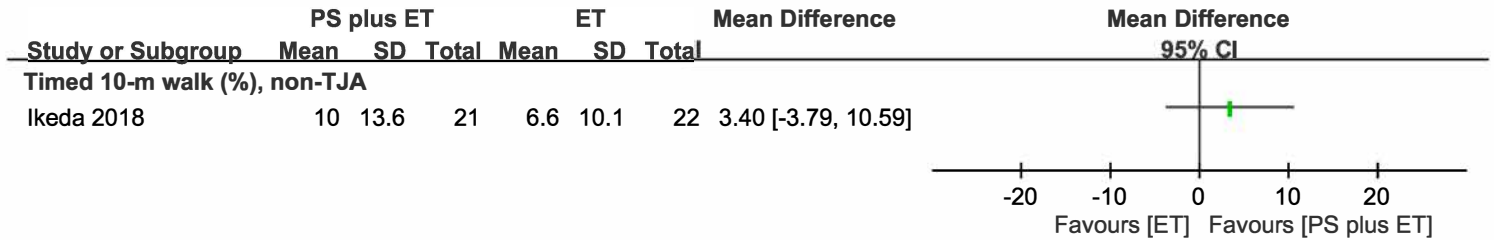

**Figure S5.** Forest plot summarizing the effects of protein supplementation (PS) plus exercise training (ET) on changes in walking speed in patients who did not undergo total joint arthroplasty. For each trial, the square represents the point estimate of the intervention effect. The horizontal line links the lower and upper limits of the 95% CI of this effect. Trial results plotted on the right-hand side of the vertical axis indicate effects in favor of protein supplementation.

95% CI, 95% confidence interval; Std, standard; IV, inverse variance; TJA, total joint arthroplasty.

Supplementary Figure S6

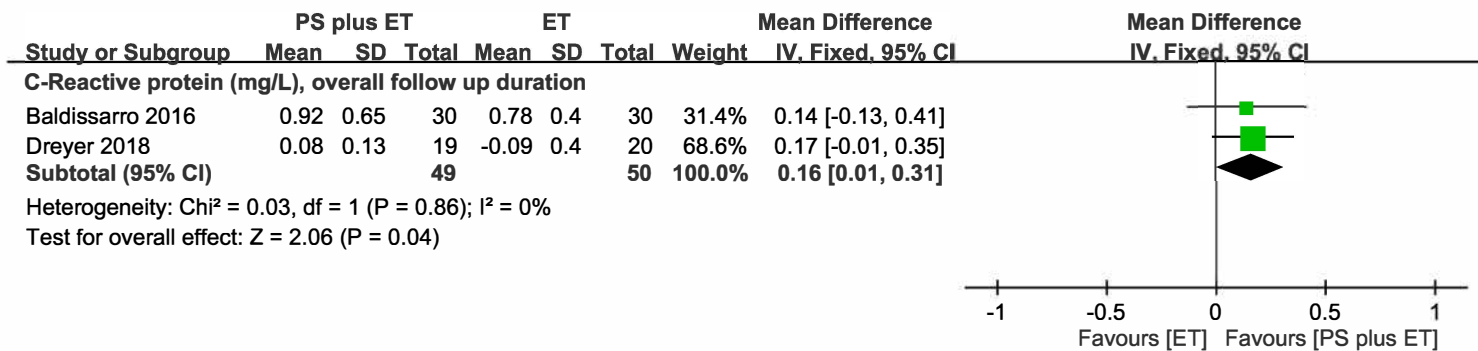

**Figure S6.** Forest plot summarizing the effects of postoperative protein supplementation (PS) plus exercise training (ET) on changes in C-reactive protein over the overall follow-up period. For each trial, the square represents the point estimate of the intervention effect. The horizontal line links the lower and upper limits of the 95% CI of this effect. The area of the squares reflects the relative weight of the trials in the meta-analysis. Trial results plotted on the right-hand side of the vertical axis indicate effects in favor of protein supplementation. The combined effects are plotted using black diamonds.

95% CI, 95% confidence interval; Std, standard; IV, inverse variance.

Supplementary Figure S7

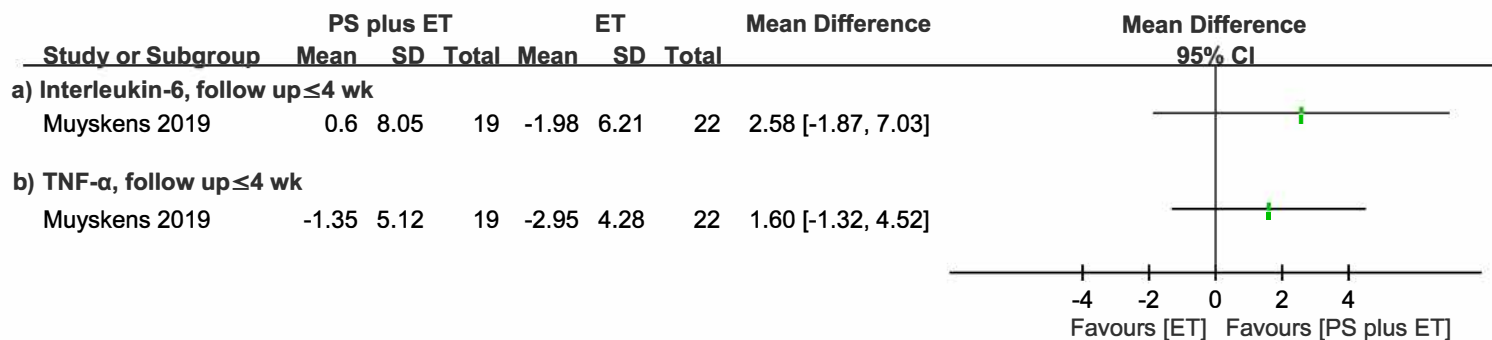

**Figure S7.** Forest plot summarizing the effects of postoperative protein supplementation (PS) plus exercise training (ET) on changes in (a) interleukin-6 and (b) TNF- $\alpha$  over short-term follow-up. For each trial, the square represents the point estimate of the intervention effect. The horizontal line links the lower and upper limits of the 95% CI of this effect. Trial results plotted on the right-hand side of the vertical axis indicate effects in favor of protein supplementation.

95% CI, 95% confidence interval; Std, standard; IV, inverse variance; TNF- $\alpha$ , tumor necrosis factor- $\alpha$ .

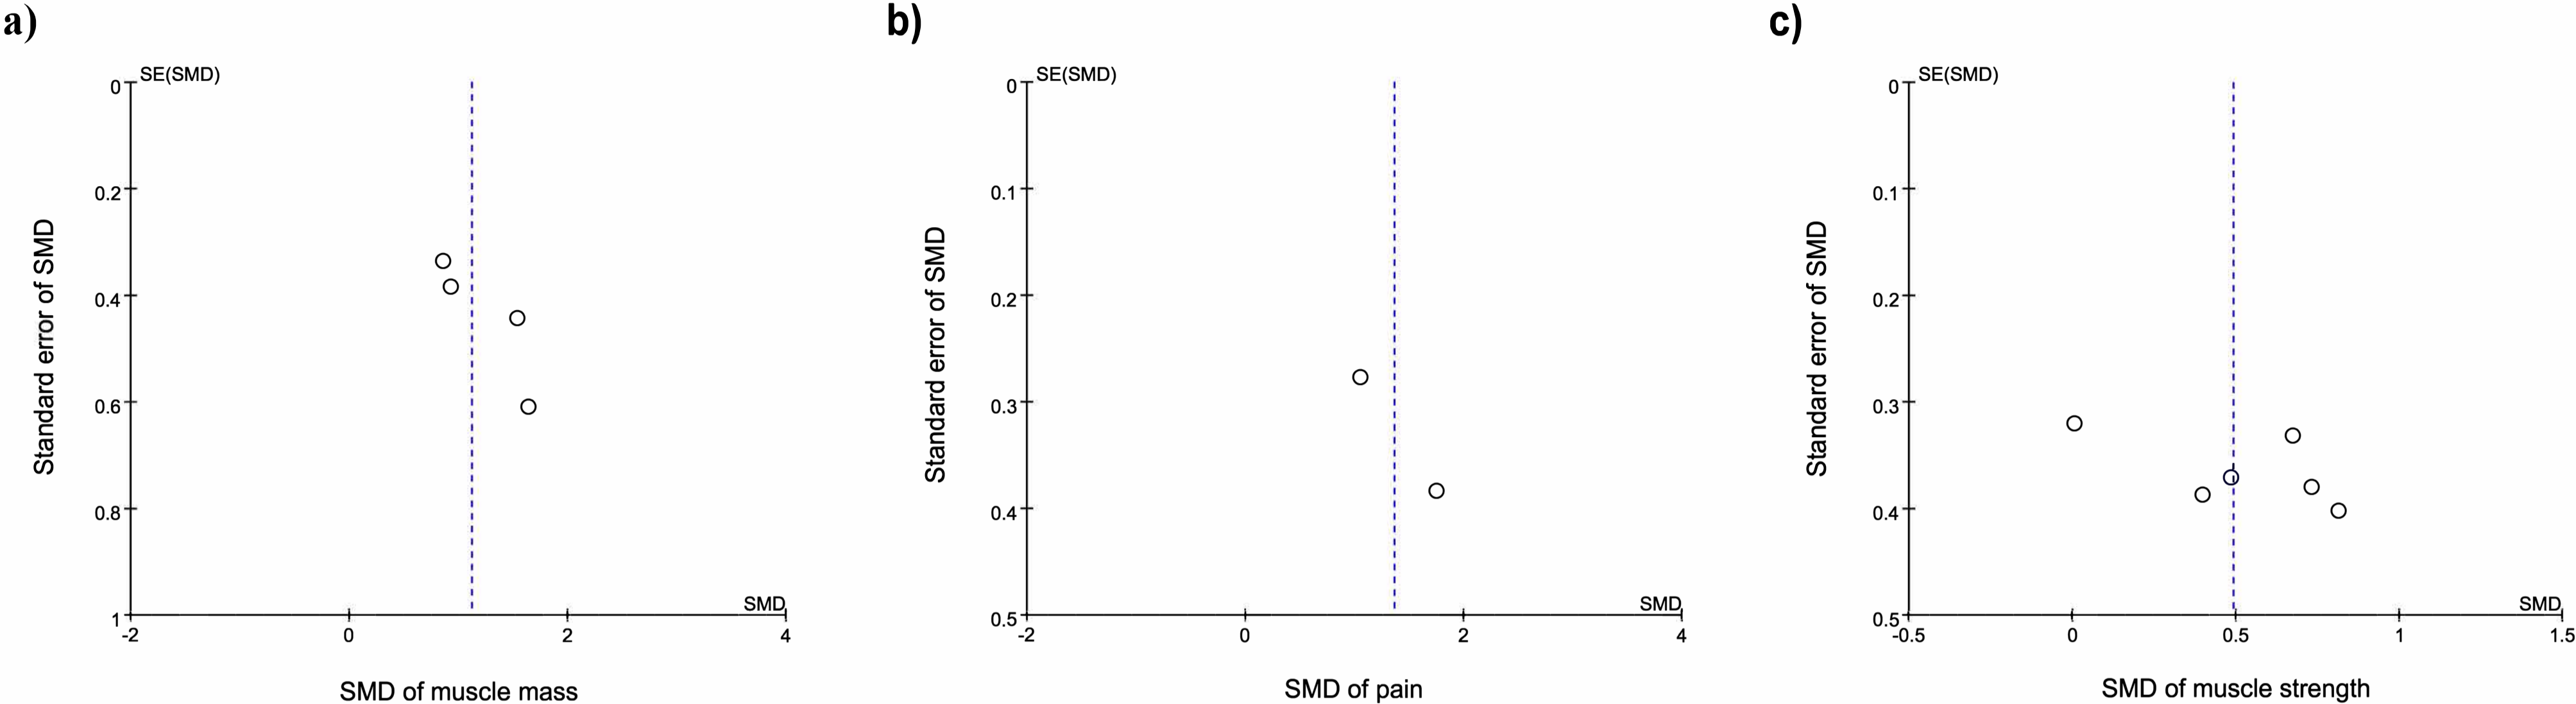

**Figure S8.** Funnel plots of intervention effects for (a) muscle mass, (b) pain, and (c) muscle strength. Each circle denotes an independent comparison, with the X-axis representing a standard mean difference (SMD) over control comparisons and the Y-axis depicting the standard error (SE) of SMD. The vertical dotted line indicates the SMD of the combined effect for each outcome measure.
